# Supplementary material for: Kupffer-derived matrix metalloproteinase-9 contributes to liver fibrosis resolution
Source: PubMed Central journal article supplement — Int J Biol Sci. 2018 Jun 3;14(9):1033–40. doi: 10.7150/ijbs.25589 (PMC6036732; doi:10.7150/ijbs.25589), 2018-06-03
Supplement: ijbsv14p1033s1.pdf [file ijbsv14p1033s1.pdf]

Fig. S1

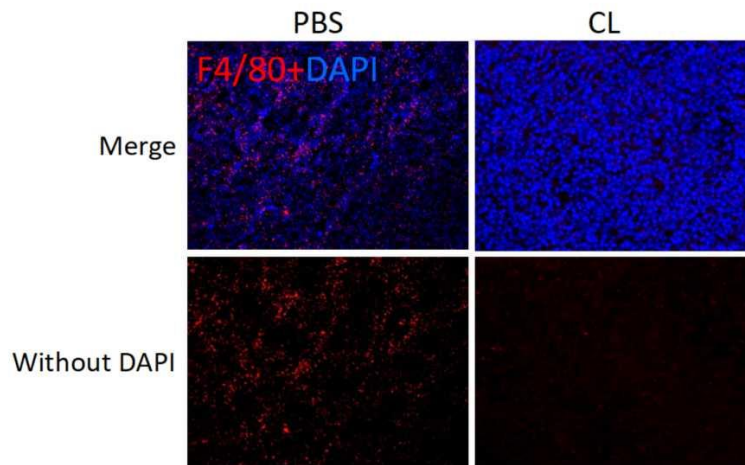

**Figure S1. The effective of KC depletion.** The efficiency of KC depletion was determined by immunofluorescent staining (PE-anti-F4/80) at 24 hours after treatment of Cl2MDP.

Fig. S2

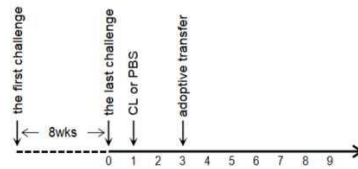

**Figure S2. The challenge course of KC treatment following its depletion.** WT mice were treated with TAA (0.1 mg/g body weight, ip) every 2 days for 8 weeks. After TAA withdrawal, mice were treated with Cl2MDP (100 ml/mouse, iv) at 1 day, and then were adoptively transferred with KCs ( $2 \times 10^6$ /mice) from WT or MMP9<sup>-/-</sup> mice at 3 days.

Fig. S3

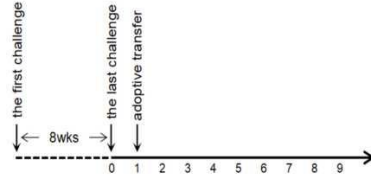

**Figure S3. The challenge course of KC treatment in MMP9<sup>-/-</sup> mice.** MMP9<sup>-/-</sup> mice were treated with TAA (0.1 mg/g body weight, ip) every 2 days for 8 weeks. After TAA withdrawal, KCs ( $2 \times 10^6$ /mice) from WT or MMP9<sup>-/-</sup> mice were adoptively transferred at 1 day.

Fig. S4

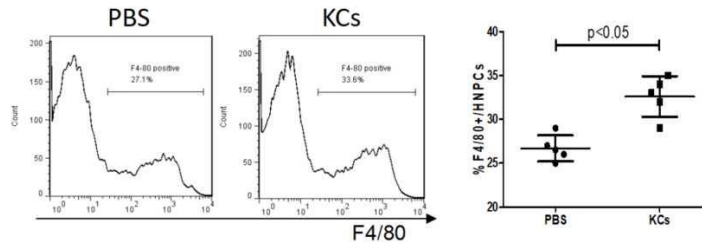

**Figure S4. The effective of adoptive transfer of KCs.** The rates of KCs were determined by flow cytometry at 24 hours after adoptive transfer.
